8. Smith, H. W., Rovenstine, E. A., Goldring, W., Chasis, H., and Ranges, H. A.: The effects of spinal anesthesia on the circulation in normal unoperated man with reference to the autonomy of the arterioles, and especially those of the renal circulation, *J. Clin. Invest.* **18**: 319, 1939.
9. Goldfarb, W., Provisor, B., and Koster, H.: Circulation during spinal anesthesia, *Arch. Surg.* **39**: 429, 1939.
10. Rovenstine, E. A., Papper, E. M., and Bradley, S. E.: Circulatory adjustments during spinal anesthesia in normal man with special reference to the autonomy of arteriolar tone, *ANESTHESIOLOGY* **3**: 421, 1942.
11. Pugh, L. G. C., and Wyndham, C. L.: The circulatory effects of high spinal anesthesia in hypertensive and control subjects, *Clin. Sci.* **9**: 189, 1950.
12. Ward, R. J., Bonica, J. J., Freund, F. G., Akamatsu, T., Danziger, F., and Englesson, S.: Epidural and subarachnoid anesthesia, Cardiovascular and respiratory effects, *J.A.M.A.* **191**: 99, 1965.
13. Li, T. H., Shimosato, S., Gamble, C. A., and Etsten, B. E.: Hemodynamics of mephentermine during spinal anesthesia in man, *ANESTHESIOLOGY* **24**: 817, 1963.
14. Whitney, R. J.: The measurement of volume changes in human limbs, *J. Physiol.* **121**: 1, 1953.
15. Elsner, R. W., Eagan, C. J., and Andersen, S.: Impedance matching circuit for the mercury strain gauge, *J. Appl. Physiol.* **14**: 871, 1959.
16. Honda, N.: Temperature compensation for mercury strain gauge used in plethysmography, *J. Appl. Physiol.* **17**: 572, 1962.
17. Greenfield, A. D. M., Whitney, R. J., and Mowbray, J. F.: Methods for the investigation of peripheral blood flow, *Brit. Med. Bull.* **19**: 101, 1963.
18. Wood, J. E., and Eckstein, J. W.: A tandem forearm plethysmograph for study of acute responses of the peripheral veins of man: The effect of environmental and local temperature change, and the effect of pooling blood in the extremities, *J. Clin. Invest.* **37**: 41, 1958.
19. Shimosato, S., Li, T. H., and Etsten, B. E.: Ventricular function during halothane anesthesia in closed chest dog, *Circ. Res.* **12**: 63, 1963.
20. Shimosato, S., Gamble, C., Ron, A., and Etsten, B. E.: Evaluation of an on-line computer for cardiac output determination (unpublished data).
21. Severinghaus, J. W.: Electrodes for blood and gas  $P_{CO_2}$ ,  $P_{O_2}$ , and blood pH, *Acta Anesth. Scand., Suppl* **11**: 207, 1962.
22. Li, T. H., Laasberg, L. H., and Etsten, B. E.: Effects of anesthetics on myocardial catecholamines, *ANESTHESIOLOGY* **25**: 641, 1964.
23. Greene, N. M.: *Physiology of Spinal Anesthesia*. Baltimore, Williams & Wilkins Co., 1958, p. 37.
24. Dripps, R. D.: Circulatory changes during spinal anesthesia: Their physiological basis, *S. Clin. N. Amer.* **26**: 1377, 1946.
25. Kennedy, W. F., Jr., Bonica, J. J., Akamatsu, T. J., Ward, R. J., Martin, W. E., and Grinstein, A.: Cardiovascular and respiratory effects of subarachnoid block in the presence of acute blood loss, *ANESTHESIOLOGY* **29**: 29, 1968.
26. Green, H. D.: *Circulatory System: Physical Principles in Medical Physics II*. Chicago, Year Book Publishers, 1950, pp. 228-250.
27. Otton, P. E., and Wilson, E. J.: The cardiocirculatory effects of upper thoracic epidural analgesia, *Canad. Anaesth. Soc. J.* **13**: 541, 1966.
28. Etsten, B. E., and Shimosato, S.: Myocardial contractility: Performance of the heart during anesthesia. In: Fabian, L. W. (ed.): *Anesthesia and the Circulation*. Philadelphia, F. A. Davis Co., 1964, pp. 56-78.
29. Rushmer, R. F.: Initial ventricular impulse. A potential key to cardiac evaluation, *Circulation* **29**: 268, 1964.

---

### Erratum

In the Abstract, "Thiobarbiturate-Succinylcholine-Oxygen for Uncomplicated Cesarean Section" (*ANESTHESIOLOGY* **30**: 344, 1969), co-author T. Takahashi's name was misspelled.
